# Supplementary material for: Cost-effectiveness of Screening for Osteoporosis in Older Men With a History of Falls
Source: PubMed Central journal article supplement (PMC7708999; doi:10.1001/jamanetworkopen.2020.27584), 2020-12-01
Supplement: jamanetwopen-e2027584-s001.pdf [file jamanetwopen-e2027584-s001.pdf]

## Supplementary Online Content

Ito K. Cost-effectiveness of screening for osteoporosis in older men with a history of falls. *JAMA Netw Open*. 2020;3(12):e2027584.  
doi:10.1001/jamanetworkopen.2020.27584

### **eTable.** Age-Dependent Model Parameters

This supplementary material has been provided by the authors to give readers additional information about their work.

| eTable. Age-Dependent Model Parameters |       |            |           |
|----------------------------------------|-------|------------|-----------|
| Parameter                              | Value | Range      | Reference |
| Prevalence of osteoporosis (%)         |       |            | 3         |
| 50-59                                  | 3.40  | 1.94-4.86  |           |
| 60-69 (base case)                      | 3.30  | 1.98-4.62  |           |
| 70-79                                  | 5.00  | 3.75-6.25  |           |
| 80+                                    | 10.90 | 8.18-16.35 |           |
| Incidence of fractures (% per year)    |       | 50%-200%   | 52, 53    |
| Hip                                    |       |            |           |
| 50-54                                  | 0.028 |            |           |
| 55-59                                  | 0.038 |            |           |
| 60-64                                  | 0.066 |            |           |
| 65-69 (base case)                      | 0.118 |            |           |
| 70-74                                  | 0.210 |            |           |
| 75-79                                  | 0.402 |            |           |
| 80-84                                  | 0.813 |            |           |
| 85+                                    | 1.630 |            |           |
| Clinical vertebral                     |       |            |           |
| 50-54                                  | 0.043 |            |           |
| 55-59                                  | 0.046 |            |           |
| 60-64                                  | 0.178 |            |           |
| 65-69 (base case)                      | 0.114 |            |           |
| 70-74                                  | 0.214 |            |           |
| 75-79                                  | 0.350 |            |           |
| 80-84                                  | 0.358 |            |           |
| 85+                                    | 1.239 |            |           |
| Wrist                                  |       |            |           |
| 50-54                                  | 0.147 |            |           |
| 55-59                                  | 0.064 |            |           |
| 60-64                                  | 0.141 |            |           |
| 65-69 (base case)                      | 0.095 |            |           |
| 70-74                                  | 0.064 |            |           |
| 75-79                                  | 0.045 |            |           |
| 80-84                                  | 0.149 |            |           |
| 85+                                    | 0.094 |            |           |
| Humeral                                |       |            |           |
| 50-54                                  | 0.027 |            |           |
| 55-59                                  | 0.048 |            |           |
| 60-64                                  | 0.081 |            |           |
| 65-69 (base)                           | 0.142 |            |           |
| 70-74                                  | 0.160 |            |           |
| 75-79                                  | 0.134 |            |           |
| 80-84                                  | 0.075 |            |           |
| 85+                                    | 0.188 |            |           |
| Utility multiplier                     |       |            | 48        |
| Fracture-free health state             |       |            |           |
| 50-59                                  | 0.86  | 0.85-0.86  |           |
| 60-69 (base case)                      | 0.84  | 0.83-0.85  |           |
| 70-79                                  | 0.80  | 0.79-0.82  |           |
| 80+                                    | 0.78  | 0.76-0.81  |           |
